# Supplementary material for: Cost-effectiveness of repeat delayed imaging for spontaneous subarachnoid hemorrhage
Source: PubMed Central journal article supplement (PMC10370759; doi:10.1371/journal.pone.0289144), 2023-07-26
Supplement: pone.0289144.s001.pdf [file pone.0289144.s001.pdf]

### Sensitivity Analysis: Strategy 1 vs. Strategy 2

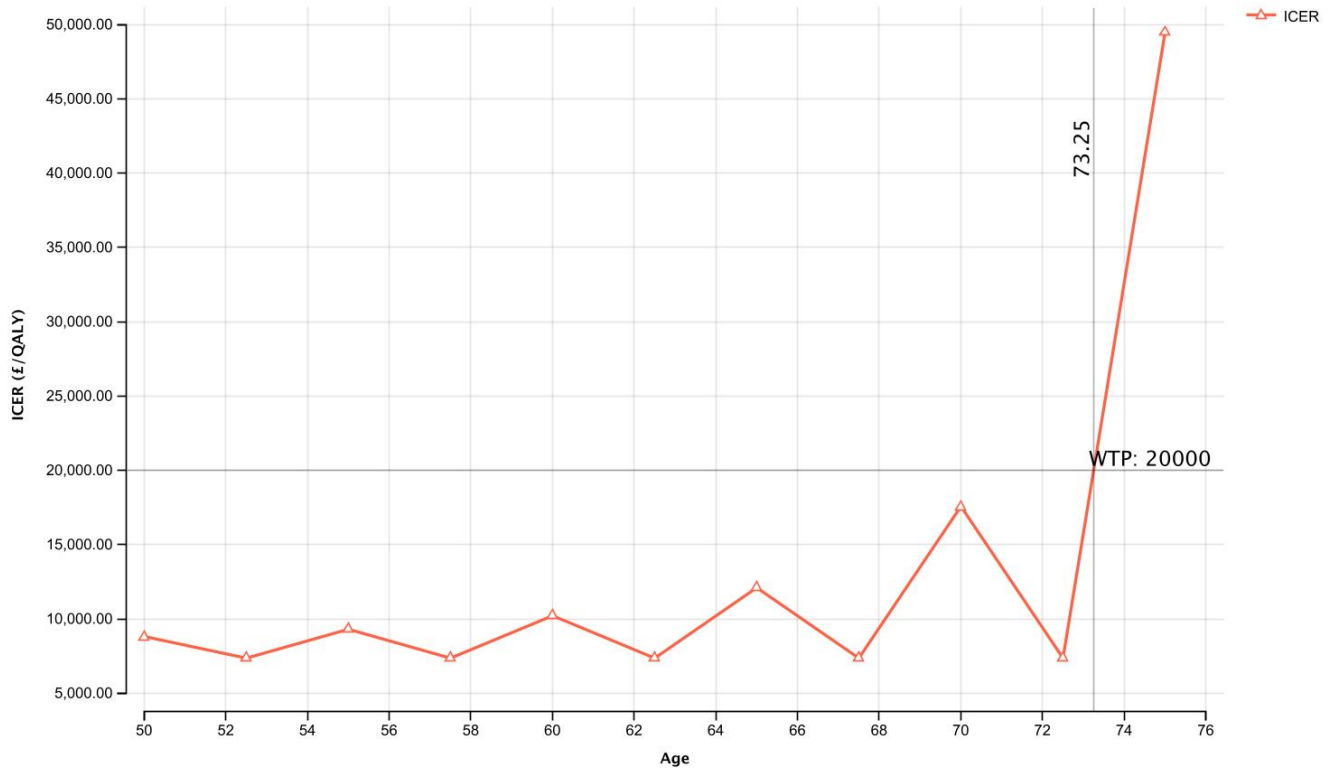

1

2 **Fig 1.** Results of one-way sensitivity analysis for Age. This analysis was performed by using a WTP of £20 000/  
3 QALY. ICER, incremental cost-effectiveness ratio.

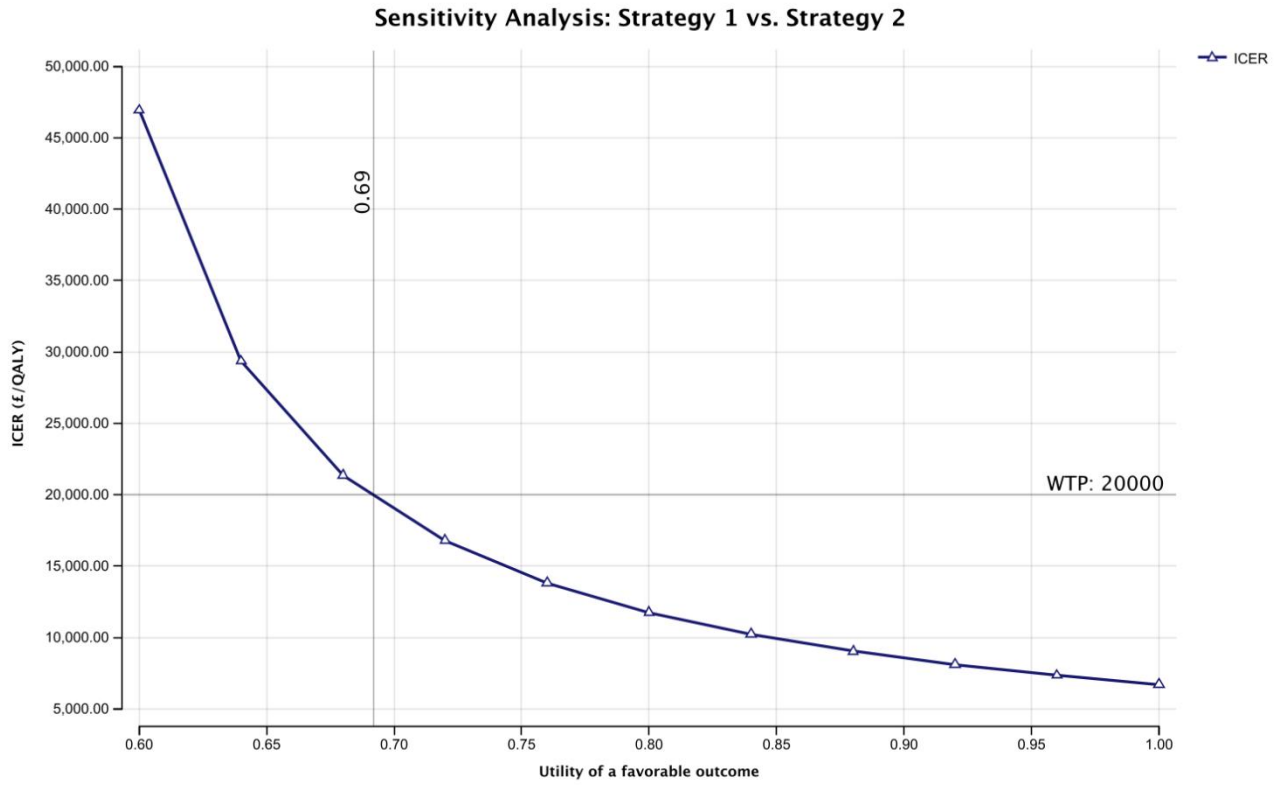

4

5 **Fig 2.** Results of one-way sensitivity analysis for Utility of a favorable outcome. This analysis was performed by using  
 6 a WTP of £20 000/ QALY. CTA, computed tomographic angiography; ICER, incremental cost-effectiveness ratio.

7

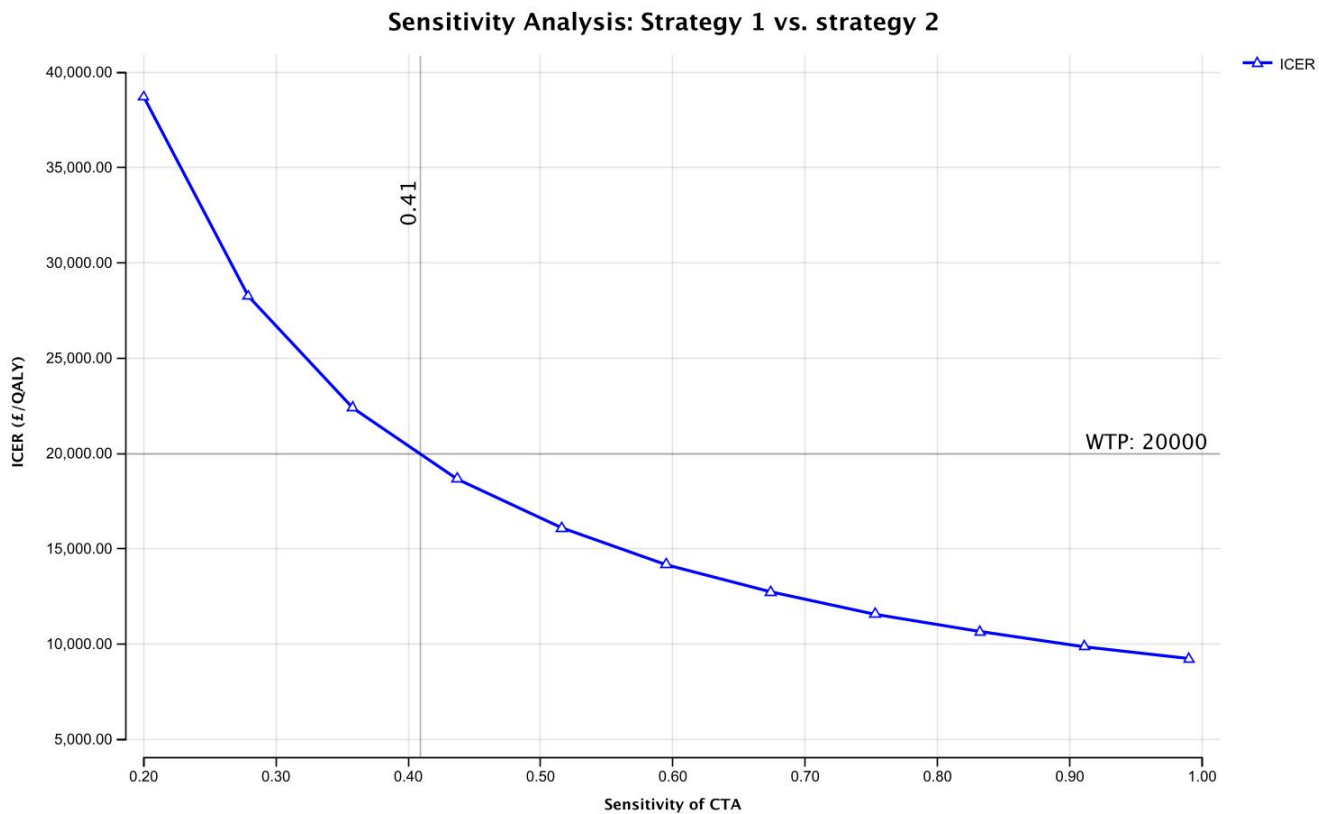

8

9 **Fig 3.** Results of one-way sensitivity analysis for Sensitivity of CTA. This analysis was performed by using a WTP of  
 10 £20 000/ QALY. CTA, computed tomographic angiography; ICER, incremental cost-effectiveness ratio.

### Sensitivity Analysis: Strategy 1 vs. Strategy 2

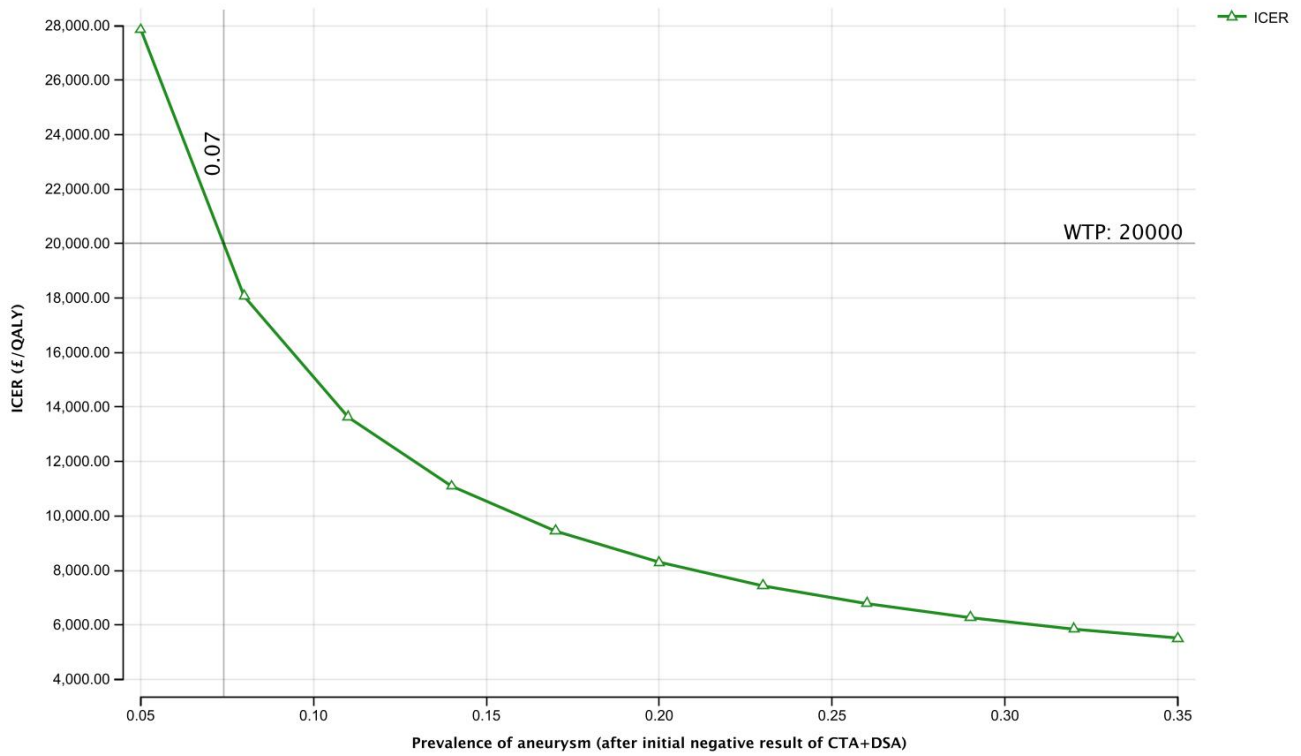

11

12 **Fig 4.** Results of one-way sensitivity analysis for Incidence of aneurysm. This analysis was performed by using a WTP  
13 of £20 000/ QALY. CTA, computed tomographic angiography; ICER, incremental cost-effectiveness ratio.
